# Supplementary material for: Heterogenization of homogenous oxidative desulfurization reaction on graphene-like boron nitride with a peroxomolybdate ionic liquid
Source: Royal Society of Chemistry journal article supplement (doi:10.1039/c5ra23272d), 2015-12-09
Supplement: c5ra23272d1.pdf [file c5ra23272d1.pdf]

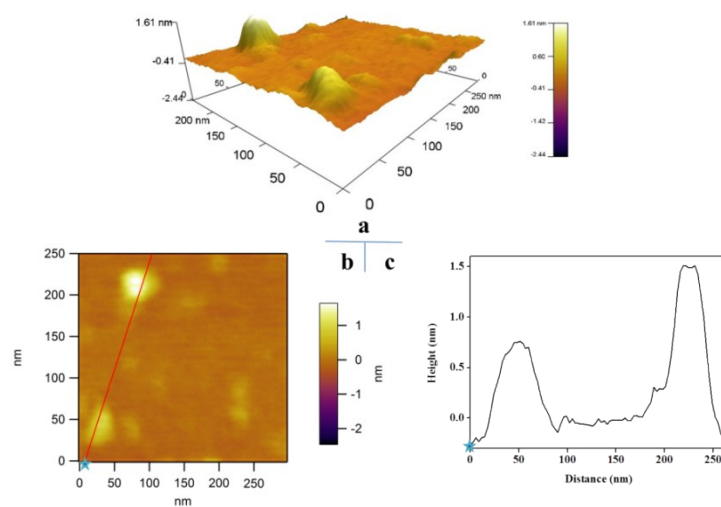

Fig. S1 AFM images and corresponding height profiles of G-*h*-BN

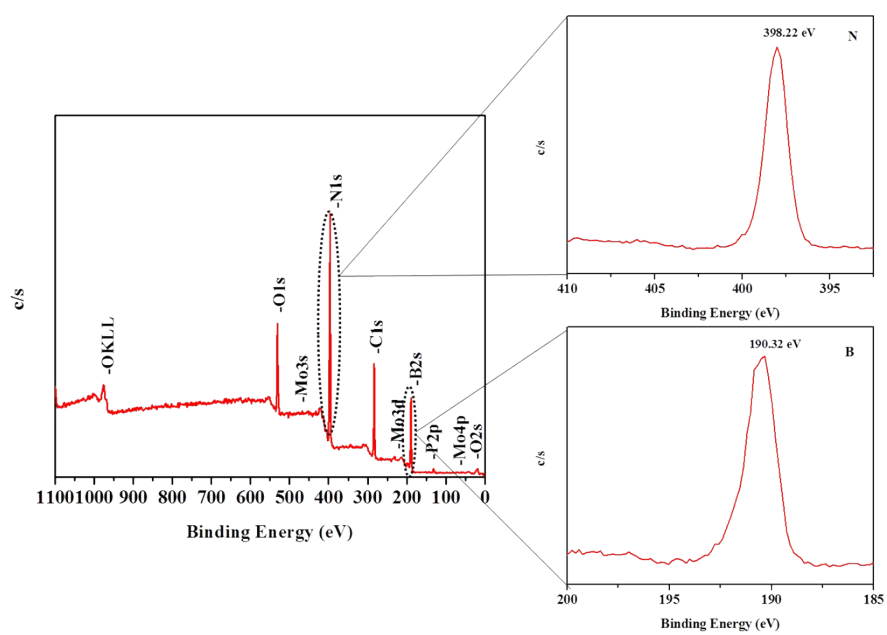

Fig.S2 XPS spectra of 20% PMo IL/G-h-BN

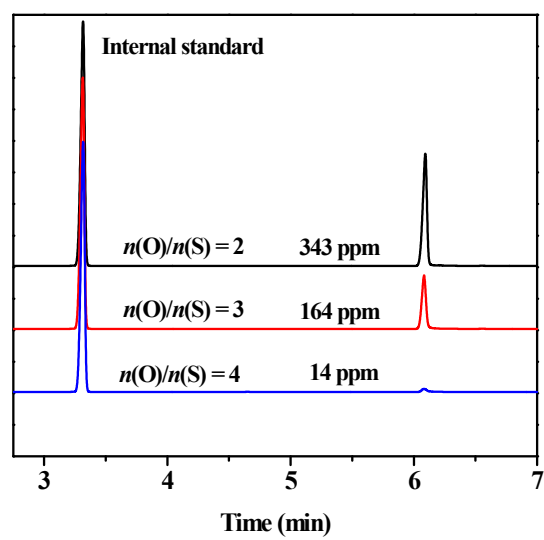

Fig. S3 Effects of the amount of  $\text{H}_2\text{O}_2$  on sulfur removal

Reaction condition:  $T = 60^\circ\text{C}$ ;  $V(\text{oil}) = 5 \text{ mL}$ ;  $m(\text{catalyst}) = 0.05 \text{ g}$ ;  $t = 80 \text{ min}$
